# Supplementary material for: Design and protocol of Estrogenic Regulation of Muscle Apoptosis (ERMA) study with 47 to 55-year-old women's cohort: novel results show menopause-related differences in blood count
Source: PubMed Central journal article supplement — Menopause. 2018 Aug 27;25(9):1020–32. doi: 10.1097/GME.0000000000001117 (PMC6110369; doi:10.1097/gme.0000000000001117), 2018-08-27
Supplement: menop-25-1020-s003.pdf [file menop-25-1020-s003.pdf]

Date: \_\_\_ / \_\_\_ 201\_\_

ID \_\_\_\_\_

Recipient \_\_\_\_\_

Please mark a cross (X) before the statements that apply to you.

My age is \_\_\_\_\_ years

**I have (had):**

- Coronary artery disease  
 Heart attack  
 Balloon angioplasty of the coronary artery  
 Artificial cardiac pacemaker / implantable cardiac defibrillator  
 Heart rhythm disturbance  
 Heart valve disease  
 Heart failure  
 Congenital heart disease  
 Heart surgery  
 Heart catheterisation

**Symptoms**

- I experience chest pain during physical activity or other physical effort  
 Sometimes I experience unreasonable breathlessness  
 I have experienced dizziness, fainting or blackouts  
 I take heart medication

**Other health issues**

- I have diabetes  
 I have asthma or another lung disease  
 I have burning or cramp-like sensations in my lower limbs (thighs or legs) when I walk short distances  
 I have musculoskeletal problems that restrict my physical activity  
 I am concerned about the safety of my workouts  
 I am on prescription medication  
 I am pregnant

**Cardiovascular disease risk factors**

- I smoke or have given up smoking during the past six months  
 My systolic blood pressure is  $\geq 140$  mmHg and/or my diastolic blood pressure  $\geq 90$  mmHg  
 I do not know what my blood pressure is  
 I am on blood pressure medication  
 My total cholesterol level is  $> 5.2$  mmol/l  
 I do not know what my total cholesterol level is  
 A close relative of mine has had a heart attack or undergone heart surgery before the age of 55 (father or brother) or 60 (mother or sister)  
 I am physically inactive (i.e. physically active less than 30 minutes on at least three days a week)  
 My body mass index is over  $30 \text{ kg/m}^2$   
 None of the above statements applies to me

I have \_\_\_ local anaesthetic allergy; \_\_\_ hemorrhagic disease; \_\_\_ medication that reduces blood clotting

\_\_\_ I am currently menstruating; day \_\_\_ of my period

**Please turn over**

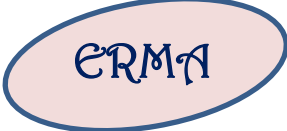

Date: \_\_\_ / \_\_\_ 201\_

ID \_\_\_\_\_

Recipient \_\_\_\_\_

|  | Yes | No |
|--|-----|----|
|--|-----|----|

|                                           |       |       |
|-------------------------------------------|-------|-------|
| I have had cancer; diagnosed _____ (year) | _____ | _____ |
|-------------------------------------------|-------|-------|

|                                                    |       |       |
|----------------------------------------------------|-------|-------|
| - The cancer was found to be cured over a year ago | _____ | _____ |
|----------------------------------------------------|-------|-------|

|                                                                                                    |       |       |
|----------------------------------------------------------------------------------------------------|-------|-------|
| - I have received cancer treatments, such as cytostatic or radiation therapy, during the past year | _____ | _____ |
|----------------------------------------------------------------------------------------------------|-------|-------|

\*\*\*\*\*
